# Supplementary material for: FeCo nanoparticles-embedded carbon nanofibers as robust peroxidase mimics for sensitive colorimetric detection of l-cysteine
Source: Royal Society of Chemistry journal article supplement (doi:10.1039/c7dt01611e), 2017-01-01
Supplement: c7dt01611e1.pdf [file c7dt01611e1.pdf]

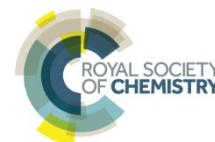

PAPER

**Electronic Supplementary Information (ESI) for**

**FeCo nanoparticles-embedded carbon nanofibers as robust peroxidase mimics for sensitive colorimetric detection of L-cysteine**

Received 00th January 20xx,  
Accepted 00th January 20xx

DOI: 10.1039/x0xx00000x

[www.rsc.org/](http://www.rsc.org/)

**Ze Zhou Yang, Yun Zhu, Guangdi Nie, Meixuan Li, Ce Wang, Xiaofeng Lu\***

Alan G. MacDiarmid Institute, College of Chemistry, Jilin University, Changchun, 130012, P. R. China

**Corresponding Author:** xflu@jlu.edu.cn

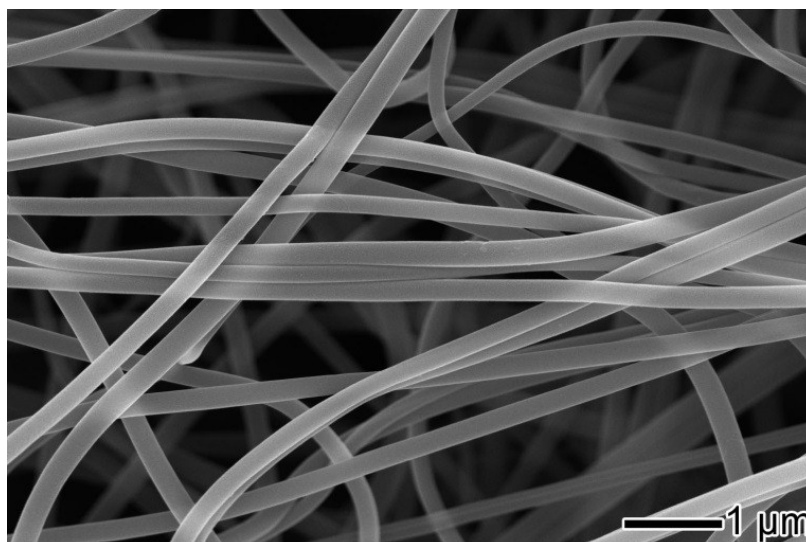

Fig. S1 SEM image of the electrospun PVP/Co(NO<sub>3</sub>)<sub>2</sub>/Fe(NO<sub>3</sub>)<sub>3</sub> composite nanofibers.

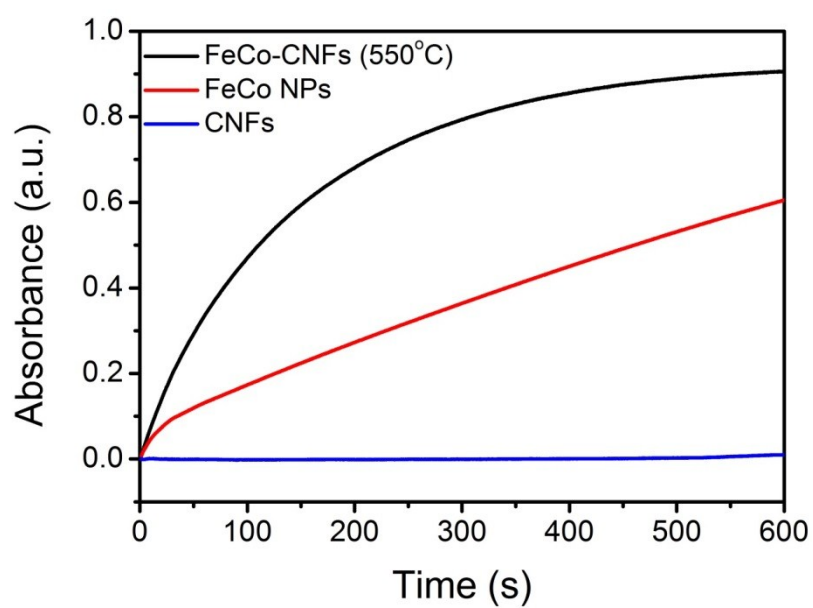

Fig. S2 UV-vis absorption curves of diverse systems containing different catalysts in the presence of fixed TMB (0.1 mM) and H<sub>2</sub>O<sub>2</sub> (65 mM).
